# Supplementary material for: Deep level trapped defect analysis in CH3NH3PbI3 perovskite solar cells by deep level transient spectroscopy
Source: Royal Society of Chemistry journal article supplement (doi:10.1039/c7ee00303j), 2017-01-01
Supplement: c7ee00303j1.pdf [file c7ee00303j1.pdf]

## Supplementary information

### Deep level trapped defect analysis in $\text{CH}_3\text{NH}_3\text{PbI}_3$ perovskite solar cells by Deep Level Transient Spectroscopy

Sung Heo<sup>1†</sup>, Gabseok Seo<sup>3†</sup>, Yonghui Lee<sup>4</sup>, Dongwook Lee<sup>2★</sup>, Minsu Seol<sup>2</sup>, Jooho Lee<sup>1</sup>, Jong-

Bong Park<sup>1</sup>, Ki Hong Kim<sup>1</sup>, Dong-Jin Yun<sup>1</sup>, Yongsu Kim<sup>1</sup>, Jaikwang Shin<sup>1</sup>, Tae Kyu Ahn<sup>3★</sup>,

and Mohammad Khaja Nazeeruddin<sup>4★</sup>

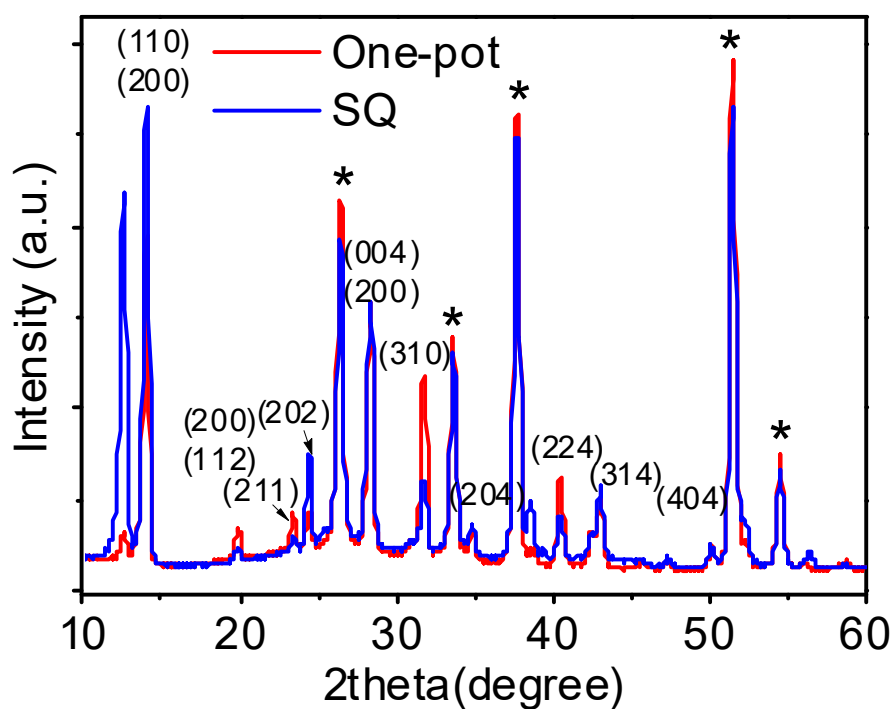

**Fig. S1.** X-Ray diffraction patterns of the perovskite films prepared by One-pot and SQ methods. The asterisk marks indicate that they are from FTO.

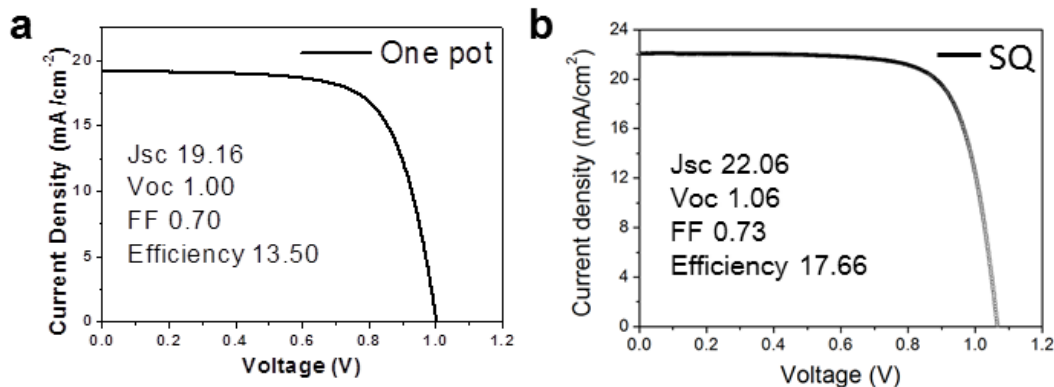

**Fig. S2.** The photovoltaic efficiencies of the perovskite solar cells (a) Solar cell parameters of One-pot sample and (b) SQ sample.

The DLTS measurements were carried out with a PhysTech FT 1030 DLTS system at various temperatures with forward and reverse bias. Temperature scans were made between 20 and 430 K, at a heating rate of 2 K/min. The capacitances of samples were measured using a modified Boonton 72B capacitance meter with a 1 MHz capacitance meter. The pulse height, filling pulse width, and pulse period width were 0.4 V, 10 ms, and 10 ms, respectively. The applied bias voltages were 0.4eV and 0.8eV for the forward mode, and -0.8eV and -0.4eV for the reverse mode, respectively. The measurements were conducted 4 times for checking out reproducibility. The pulse frequency for the voltage was 100MHz. We characterized the cell just after fabrication (as-prepared) and repeated the measurements every 5 days.

The composition change of the perovskite layer was characterized with X-ray Photoemission Spectroscopy (XPS). The XPS depth profiles of as-prepared, aged 5 days, and aged 10 days are shown in Fig S3.

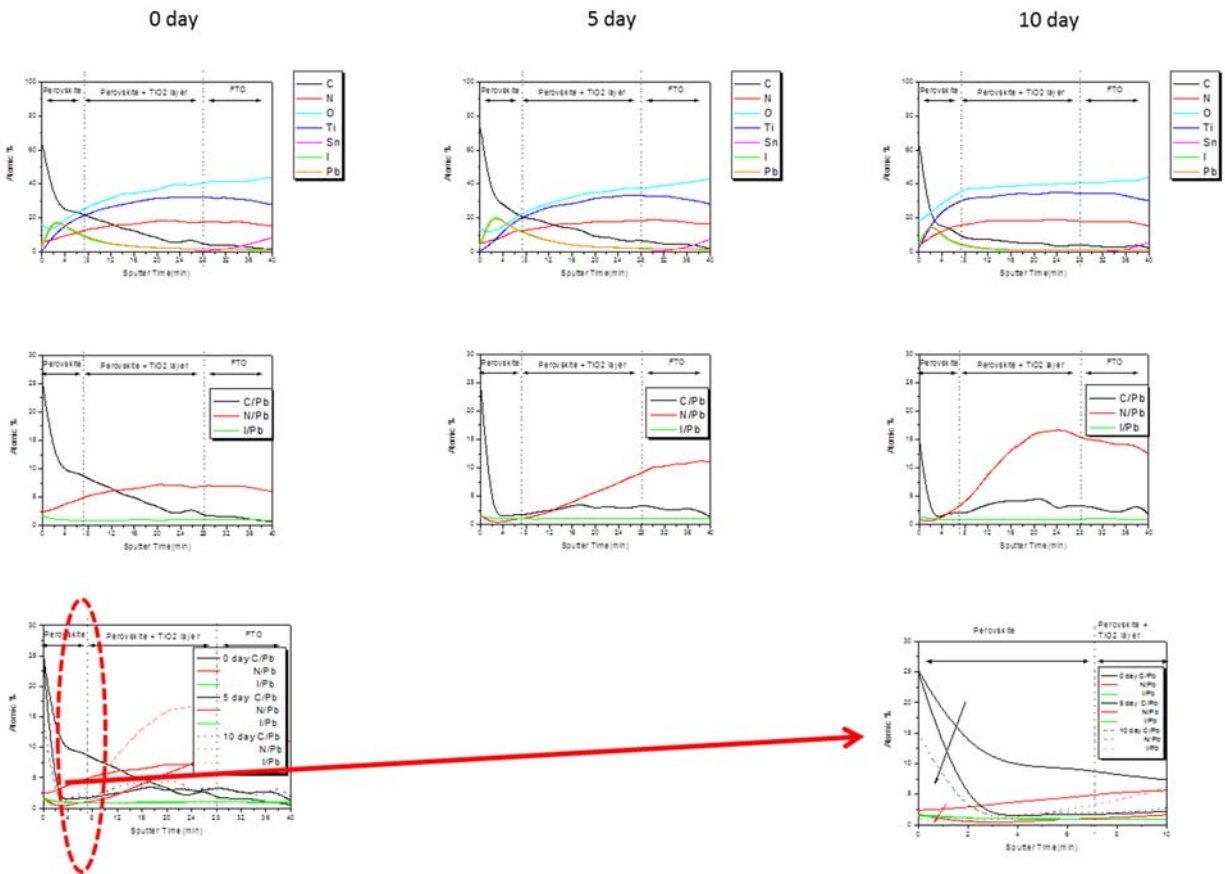

**Fig. S3.** The composition change of the perovskite layer was characterized with X-ray Photoemission Spectroscopy (XPS). The XPS depth profiles of as-prepared, aged 5 days, and aged 10 days.

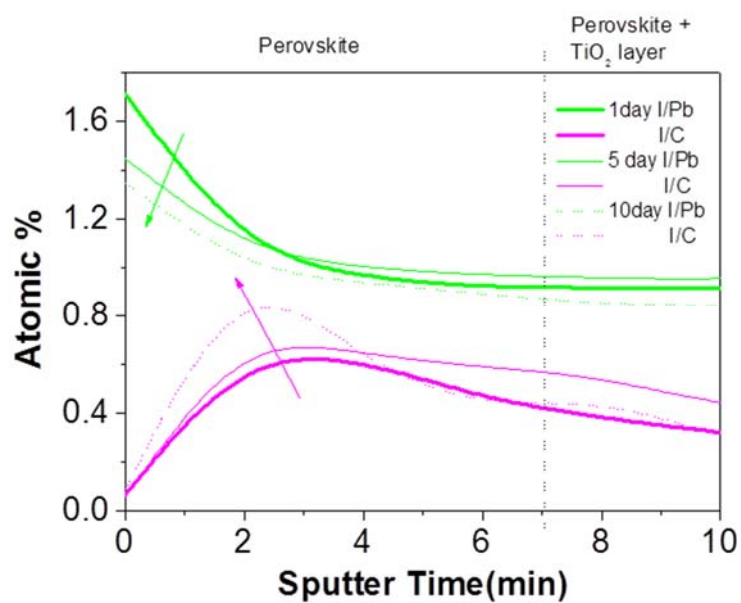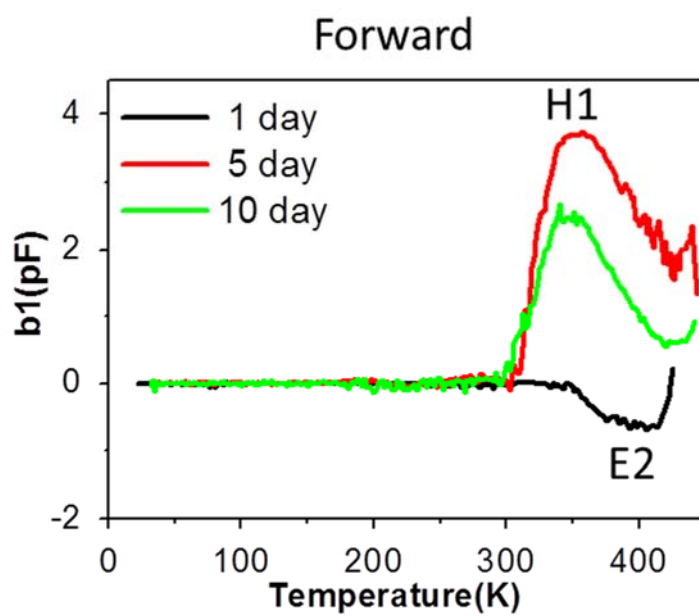

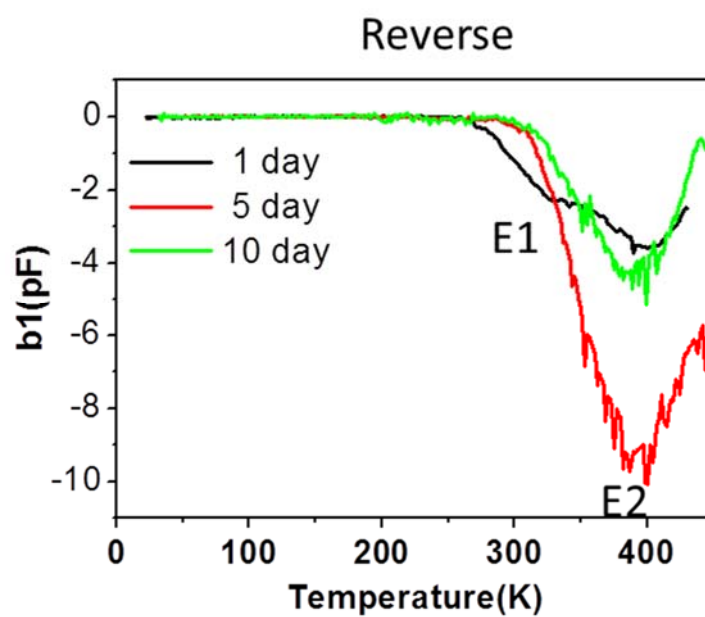

**Fig. S4.** The DLTS data for the aging effect

**Table S1.** Quantitative EDX analysis displayed in Figure 1.

| Sample              | C1s<br>(at.%) | Pb4f<br>(at.%) | I3d5<br>(at.%) | I/Pb<br>(E1 defect) | I/C<br>(E2 defect) |
|---------------------|---------------|----------------|----------------|---------------------|--------------------|
| 1 (One-pot) reverse | 38.87         | 20.6           | 40.54          | 1.97                | 1.04               |
| 2 (One-pot) forward | 37.54         | 21.7           | 40.76          | 1.88                | 1.09               |
| 3 (Cuboid) reverse  | 38.48         | 20.56          | 40.96          | 1.99                | 1.06               |
| 4 (Cuboid) forward  | 15.24         | 29.84          | 54.91          | 1.84                | 3.60               |

**Table S2.** Defect parameters (activation energy, density and cross section) calculated using DLTS.

|                       |                                              | One-pot               |                       | Cuboid                |                       |
|-----------------------|----------------------------------------------|-----------------------|-----------------------|-----------------------|-----------------------|
|                       |                                              | E1                    | E2                    | E1                    | E2                    |
| Forward region        | Et (eV)                                      | 0.62                  |                       | 0.62                  | 0.76                  |
|                       | Nt (cm <sup>-3</sup> )                       | $1.3 \times 10^{15}$  |                       | $5.0 \times 10^{14}$  | $9.5 \times 10^{14}$  |
|                       | Cross section ( $\sigma$ , cm <sup>2</sup> ) | $2.5 \times 10^{-15}$ |                       | $5.2 \times 10^{-14}$ | $2.5 \times 10^{-14}$ |
| Reverse region        | Et (eV)                                      |                       | 0.75                  |                       | 0.75                  |
|                       | Nt (cm <sup>-3</sup> )                       |                       | $3.9 \times 10^{14}$  |                       | $2.0 \times 10^{15}$  |
|                       | Cross section ( $\sigma$ , cm <sup>2</sup> ) |                       | $2.7 \times 10^{-15}$ |                       | $5.0 \times 10^{-14}$ |
| Carrier concentration |                                              | $1.8 \times 10^{16}$  |                       | $6.7 \times 10^{16}$  |                       |

**Table S3.** Summary of the One-pot and SQ samples investigated in this work.

|         | <i>J-V</i> Measurement             |                 |           |                   | Capacitance Measurement                |
|---------|------------------------------------|-----------------|-----------|-------------------|----------------------------------------|
| Sample  | $J_{SC}$<br>(mA cm <sup>-2</sup> ) | $V_{oc}$<br>(V) | FF<br>(%) | Efficiency<br>(%) | Carrier density<br>(cm <sup>-3</sup> ) |
| One-pot | 19.16                              | 1.00            | 0.70      | 13.50             | $1.8 \times 10^{16}$                   |
| Cuboid  | 22.06                              | 1.06            | 0.73      | 17.66             | $6.7 \times 10^{16}$                   |

## Reference

1. Im, J.-H. et al., 6.5% efficient perovskite quantum-dot-sensitized solar cell. *Nanoscale* **3**, 4088-4093 (2011).
2. Heo, J. H. et al., Efficient inorganic-organic hybrid heterojunction solar cells containing perovskite compound and polymeric hole conductors. *Nature Photonics* **7**, 486-491 (2013).
3. Burschka, J. et al., Sequential deposition as a route to high-performance perovskite-sensitized solar cells. *Nature* **499**, 316-319 (2013).
